# Supplementary material for: Effector caspase Dcp-1 and IAP protein Bruce regulate starvation-induced autophagy during Drosophila melanogaster oogenesis
Source: PubMed Central journal article supplement — J Cell Biol. 2008 Sep 22;182(6):1127–39. doi: 10.1083/jcb.200712091 (PMC2542474; doi:10.1083/jcb.200712091), 2008-09-22
Supplement: jcb.200712091_2.pdf [file jcb.200712091_2.pdf]

Table S1. Comparison of essential autophagy genes in the *D. melanogaster* larval fat body and *l(2)mbn* cells

| Yeast gene   | CG number | Flybase designation | Required for autophagy in larval fat body <sup>a</sup> | Required for autophagy in <i>l(2)mbn</i> cells |
|--------------|-----------|---------------------|--------------------------------------------------------|------------------------------------------------|
| <i>Atg1</i>  | CG10967   | <i>DmAtg1</i>       | Yes                                                    | Yes                                            |
| <i>Atg2</i>  | CG1241    | <i>DmAtg2</i>       | Yes                                                    | Yes                                            |
| <i>Atg3</i>  | CG6687    | <i>DmAtg3</i>       |                                                        | Yes                                            |
| <i>Atg4</i>  | CG6194    |                     | No                                                     | Yes                                            |
|              | CG4428    | <i>DmAtg4</i>       |                                                        | No                                             |
| <i>Atg5</i>  | CG1643    | <i>DmAtg5</i>       | Yes                                                    | Yes                                            |
| <i>Atg6</i>  | CG5429    | <i>DmAtg6</i>       | Variable                                               | Yes                                            |
| <i>Atg7</i>  | CG5489    | <i>DmAtg7</i>       | Yes                                                    | Yes                                            |
| <i>Atg8</i>  | CG32672   | <i>DmAtg8a</i>      | No                                                     | Yes                                            |
|              | CG12334   | <i>DmAtg8b</i>      |                                                        | Yes                                            |
| <i>Atg9</i>  | CG3615    | <i>DmAtg9</i>       |                                                        | No                                             |
| <i>Atg12</i> | CG10861   | <i>DmAtg12</i>      | Yes                                                    | Yes                                            |
| <i>Atg18</i> | CG7986    | <i>DmAtg18</i>      | Yes                                                    | Yes                                            |
|              | CG8678    |                     | No                                                     | No                                             |

The fat body data were generated from a study by Scott R. et al. (Scott, R.C., O. Schuldiner, and T.P. Neufeld. 2004. *Dev. Cell.* 7:167-178) RNAi of 11 *DmAtg* genes showed a significant reduction in LTG high cells ( $P < 0.05$ ), which indicates that these *DmAtg* genes are required for autophagy in *l(2)mbn* cells.

<sup>a</sup>Scott, R.C., O. Schuldiner, and T.P. Neufeld. 2004. Role and regulation of starvation-induced autophagy in the *Drosophila* fat body. *Dev. Cell.* 7:167-178.

Table S2. Sequences of primers used for the preparation of dsRNAs

| Gene Name              | Amplicon length | Forward primer sequence                    | Reverse primer sequence                     |
|------------------------|-----------------|--------------------------------------------|---------------------------------------------|
| <i>Atg1</i> (CG10967)  | 701             | TAATACGACTCACTATAGGTGCGGCTCTCCCATGTATATG   | TAATACGACTCACTATAGGTGATTTTGTGCTGCTGTGGAC    |
| <i>Atg2</i> (CG1241)   | 705             | TAATACGACTCACTATAGGCCCATGATAGCCAAGCACAAT   | TAATACGACTCACTATAGGCCGAGTAGCGAAGGTAACCTTG   |
| <i>Atg3</i> (CG6687)   | 713             | TAATACGACTCACTATAGGATGTGGCCGAATATCTGACG    | TAATACGACTCACTATAGGACATCTGTCCACCGTCCAGTG    |
| CG6194                 | 703             | TAATACGACTCACTATAGGCCTTCCAAGTTGACCCGACGA   | TAATACGACTCACTATAGGACCAATCTCATCGATCTGCT     |
| <i>Atg4</i> (CG4428)   | 714             | TAATACGACTCACTATAGGACATTCGCCGAAGAAACACC    | TAATACGACTCACTATAGGTGCGTGGTATGAGGATCTAGGT   |
| <i>Atg5</i> (CG1643)   | 633             | TAATACGACTCACTATAGGAGCCGGAGCCTTCTATCTGA    | TAATACGACTCACTATAGGTGCGACATCCATTGCGATTG     |
| <i>Atg6</i> (CG5428)   | 713             | TAATACGACTCACTATAGGGCTGGAGAAGATTAGCGTGCA   | TAATACGACTCACTATAGGTAATGGTACCGAAATGCCCG     |
| <i>Atg7</i> (CG5489)   | 724             | TAATACGACTCACTATAGGCCATTGAAGTTTCTTGCCCTG   | TAATACGACTCACTATAGGAAGCCTAAAGCTGCGTTGATG    |
| <i>Atg8</i> (CG32672)  | 351             | TAATACGACTCACTATAGGTCCAATAACAAGGAGGACACG   | TAATACGACTCACTATAGGCATGCCGTAACCATCTCATCG    |
| CG12334                | 287             | TAATACGACTCACTATAGGCCAGTACAAGAAGGACCCTCG   | TAATACGACTCACTATAGGAAGTGCTCTGGTACAGTGCA     |
| <i>Atg9</i> (CG3615)   | 703             | TAATACGACTCACTATAGGACCTTGACTCGTTCTTCTCGC   | TAATACGACTCACTATAGGCAGTCCGTTTGATTGCTTC      |
| <i>Atg12</i> (CG10861) | 265             | TAATACGACTCACTATAGGTTTGTATCTTCTGAAACGCCAC  | TAATACGACTCACTATAGGTGATGTCGATCGATTAGCC      |
| <i>Atg18</i> (CG7986)  | 724             | TAATACGACTCACTATAGGAGGACATGAAGGTGGTGACCA   | TAATACGACTCACTATAGGCCTGCTCTTATTAGCTGGC      |
| CG8678                 | 707             | TAATACGACTCACTATAGGCAAGGTGGAGGAGATATTCGC   | TAATACGACTCACTATAGGCAGAAATTTTCGGACTTGGCA    |
| <i>Pten</i>            | 718             | TAATACGACTCACTATAGGTGGAAGAGAATCATGCCAG     | TAATACGACTCACTATAGGTGTTCCATCGGACTCGCAA      |
| <i>Tsc1</i>            | 709             | TAATACGACTCACTATAGGCCGATTTATCCCTTGTGGTG    | TAATACGACTCACTATAGGCCGATTTATCCCTTGTGGTG     |
| <i>Tsc2</i>            | 716             | TAATACGACTCACTATAGGGTGAATGGATCGACGGTAGCT   | TAATACGACTCACTATAGGCCTGATAATCGGTGTCGTGTT    |
| <i>Rheb</i>            | 502             | TAATACGACTCACTATAGGTGACCCCAACATTGAGAACA    | TAATACGACTCACTATAGGTATTTCCAACAGTTCCGGCCG    |
| <i>Tor</i>             | 700             | TAATACGACTCACTATAGGCAAGGATCAGAAAGCCGTGAC   | TAATACGACTCACTATAGGAAGAGCGTTATGCAAGCAA      |
| <i>S6k</i>             | 713             | TAATACGACTCACTATAGGACAGCTCTGCGAGGAGAATGT   | TAATACGACTCACTATAGGCTCGATGGTCTTCTTCCGATT    |
| <i>rpr</i>             | 227             | TAATACGACTCACTATAGGTTCTACATACCCGATCAGGCCG  | TAATACGACTCACTATAGGTGACTATTGGTTTCCCCCTG     |
| <i>hid</i>             | 703             | TAATACGACTCACTATAGGAAATCTTCCAGTATCCGCCG    | TAATACGACTCACTATAGGTGGCAGACTGGATTATTGCTG    |
| <i>grim</i>            | 387             | TAATACGACTCACTATAGGTGCGCCATCGCTATTTCATC    | TAATACGACTCACTATAGGAGCTGCTCCTCATCGTTGTC     |
| <i>sickle</i>          | 316             | TAATACGACTCACTATAGGTGACCGAATACAACATGGTCTG  | TAATACGACTCACTATAGGCACCAAGTGTGTAATAATGCATCG |
| <i>Ras</i>             | 486             | TAATACGACTCACTATAGGGGCCATTCCATTTTTCGAAG    | TAATACGACTCACTATAGGCCTGCGGTTGTATTGAACG      |
| <i>phl</i>             | 710             | TAATACGACTCACTATAGGACCCGCGAGAATATTGATGC    | TAATACGACTCACTATAGGATCGGCACCTATTGGCACAC     |
| <i>rl</i>              | 495             | TAATACGACTCACTATAGGAGTTTGTCTCATTTTCAGTATGT | TAATACGACTCACTATAGGCTTGCAATCCATCCATCC       |
| <i>th</i>              | 704             | TAATACGACTCACTATAGGCCAAACCGGCAATGACTTCA    | TAATACGACTCACTATAGGAGCTGACCCCTCATCAGCTTG    |
| <i>Bruce</i>           | 723             | TAATACGACTCACTATAGGTACACAGAACGTCGCCGCTGT   | TAATACGACTCACTATAGGCATCGGCGAACTTCTCGTATG    |
| <i>debcl</i>           | 718             | TAATACGACTCACTATAGGCAAGTTCAAGTCTCTGTCGCT   | TAATACGACTCACTATAGGCCTGTGTCATGACCCAGTAGAC   |
| <i>buffy</i>           | 626             | TAATACGACTCACTATAGGTGGAGATTACGTGGAGCAAGG   | TAATACGACTCACTATAGGCTTCTCGCCAAATGCGAAC      |
| <i>Ark</i>             | 726             | TAATACGACTCACTATAGGGTCCAGGATATGCCGAAATCA   | TAATACGACTCACTATAGGAGTGACCTGCTTGAACCGTGT    |
| <i>p53</i>             | 590             | TAATACGACTCACTATAGGTCTCCAATGATGTGAGTGTCTC  | TAATACGACTCACTATAGGTCTCGACGAGCCATTCCTTA     |
| <i>Nc</i>              | 514             | TAATACGACTCACTATAGGATCGCGAGCATATACGCAAG    | TAATACGACTCACTATAGGAATATGGCACTATCCCCACCA    |
| <i>lce</i>             | 714             | TAATACGACTCACTATAGGAGTACAACATGCGCCACAAGA   | TAATACGACTCACTATAGGGTACGATGGTGGTATGACAG     |
| <i>Dcp-1</i>           | 705             | TAATACGACTCACTATAGGTGCGTAACAGAAACTACGGAG   | TAATACGACTCACTATAGGGGAATGGTGGATAGGAGAAG     |
| <i>Damm</i>            | 695             | TAATACGACTCACTATAGGATGATCTGCCGAAAGAACAG    | TAATACGACTCACTATAGGCATAGTTGACCTTCTGTTCCGAC  |
| <i>Dredd</i>           | 722             | TAATACGACTCACTATAGGCAGCGAGTGCAATTTATCGG    | TAATACGACTCACTATAGGCGGAGCGTTACTAATGATGGTG   |
| <i>dream</i>           | 701             | TAATACGACTCACTATAGGAGTTTGAACGGCTCTCCCT     | TAATACGACTCACTATAGGTTCACCTTTCAGCTTCCAGCTG   |
| <i>decay</i>           | 704             | TAATACGACTCACTATAGGCGAGGACACATACGAGAATTGC  | TAATACGACTCACTATAGGATTCGACTGGTACTGCTAGGCC   |
| <i>Hs</i>              | 708             | TAATACGACTCACTATAGGATTGGAGACACCTTCAGACTCG  | TAATACGACTCACTATAGGAGTCTGTGCTATGTCCTCTCT    |
| <i>hid_2</i>           | 601             | TAATACGACTCACTATAGGCCGAGCAAAACTTGACTTGAG   | TAATACGACTCACTATAGGGGTACATCTGACCCACTCGTA    |
| <i>Ras_2</i>           | 565             | TAATACGACTCACTATAGGCAGCGCAATTAATTTGGTGC    | TAATACGACTCACTATAGGCGCATATACTGATCCCGCAT     |
| <i>phl_2</i>           | 709             | TAATACGACTCACTATAGGACGAGCACCTTGAACACAATC   | TAATACGACTCACTATAGGCGCCAAACAGTTCGTACATCAC   |
| <i>rl_2</i>            | 141             | TAATACGACTCACTATAGGAATTCGAGCGGATCAGTAG     | TAATACGACTCACTATAGGCATGCCATAAGCTCCTTCA      |
| <i>Dcp-1_2</i>         | 489             | TAATACGACTCACTATAGGTCAACAATGGCTCCTGGTACAT  | TAATACGACTCACTATAGGTTTCTATTGGCAAGGCTCTCGC   |
| <i>debcl_2</i>         | 465             | TAATACGACTCACTATAGGCAGTCCCGTTGAAATTCAGA    | TAATACGACTCACTATAGGTTGCTGCTGAGGCCCTTTGTT    |
| <i>Ark_2</i>           | 662             | TAATACGACTCACTATAGGGATCATTCTGATGACGCTTACGC | TAATACGACTCACTATAGGGGGCATTCCAAGCAGTTGAATC   |
| <i>p53_2</i>           | 370             | TAATACGACTCACTATAGGAATGATAGCCGAGACTGCGAC   | TAATACGACTCACTATAGGTACCCGTTAAACGCCTTACG     |
| <i>Bruce_2</i>         | 693             | TAATACGACTCACTATAGGTCCCTGGCTGAGAAAGCATATC  | TAATACGACTCACTATAGGTTATCACGTTGGCACCAAGTGT   |
| <i>lce_2</i>           | 415             | TAATACGACTCACTATAGGCAGCCCAACGATCACACAGAT   | TAATACGACTCACTATAGGCATATCGCTGTGATTCTGCG     |
| <i>buffy_2</i>         | 481             | TAATACGACTCACTATAGGCCACACTACATCCGCATCAC    | TAATACGACTCACTATAGGAACGTTGTGTTGATGCCACT     |
